# Supplementary material for: Identifying corridors for Asiatic black bear (Ursus thibetanus) in a part of Eastern Himalayas, India
Source: Frontiers journal article supplement (doi:10.3389/fcosc.2025.1470223), 2025-02-03
Supplement: Table_2.docx [file Table_2.docx]

**Captions for Supplementary Figures**

Supplementary Figure 1: Field photographs showing claw marks of bear on a tree bark and glimpse of interaction with locals

Supplementary Figure 2:Pearson correlation between all the variables; high correlated variables (R>0.70) were removed from final analysis

Supplementary Figure 3: Jackknife test of variable importance

Supplementary Figure 4: Response curves of 24 covariates used in the final MaxEnt model for Asiatic black bear distribution predictions

Supplementary Figure 5: AUC value for selected MaxENT model
