# Supplementary material for: Identifying corridors for Asiatic black bear (Ursus thibetanus) in a part of Eastern Himalayas, India
Source: Frontiers journal article supplement (doi:10.3389/fcosc.2025.1470223), 2025-02-03
Supplement: Table_3.xlsx [file Table_3.xlsx]

## Sheet: test1
	Bio1	Bio2	Bio3	Bio6	Bio7	Bio8	Bio12	Bio14	Bio15	Bio19	Aspect	DEM	Forest_ed	NDVI04	NDVI05	NDVI06	NDVI07	NDVI08	NDVI09	NDVI10	Nightlight	PA_Ed	Rivers_Ed	Slope
Bio1	1	-0.80391	0.58583	0.99793	-0.94185	0.99891	0.91505	0.58551	0.02635	0.72539	0.06425	-0.97341	-0.3072	0.66408	0.46343	0.61488	0.26567	0.32488	0.38351	0.57307	0.24645	-0.14228	-0.5611	0.02086
Bio2	-0.80391	1	-0.13284	-0.82507	0.88896	-0.8048	-0.82756	-0.59579	0.02053	-0.7353	0.01106	0.81393	0.07079	-0.5645	-0.34549	-0.43706	-0.17985	-0.22425	-0.19597	-0.42451	-0.22276	0.2263	0.31087	-0.02733
Bio3	0.58583	-0.13284	1	0.58493	-0.56468	0.56356	0.43023	0.27441	-0.01212	0.41279	0.06633	-0.53769	-0.26758	0.39375	0.15164	0.29113	0.0667	0.11082	0.16894	0.25579	0.05331	-0.16471	-0.4615	0.01648
Bio6	0.99793	-0.82507	0.58493	1	-0.95916	0.99552	0.91713	0.5971	0.02276	0.74273	0.05804	-0.97303	-0.29346	0.66135	0.45271	0.60324	0.25555	0.31652	0.37086	0.56633	0.24365	-0.15703	-0.55438	0.02253
Bio7	-0.94185	0.88896	-0.56468	-0.95916	1	-0.93158	-0.87369	-0.61569	0.04545	-0.79403	-0.02421	0.9219	0.20533	-0.63935	-0.36287	-0.49548	-0.18118	-0.24014	-0.24936	-0.47092	-0.20912	0.26222	0.49642	-0.03068
Bio8	0.99891	-0.8048	0.56356	0.99552	-0.93158	1	0.92058	0.58085	0.04207	0.71759	0.06561	-0.97478	-0.30899	0.6632	0.47194	0.62552	0.27493	0.33249	0.39481	0.58342	0.25106	-0.12611	-0.55241	0.01981
Bio12	0.91505	-0.82756	0.43023	0.91713	-0.87369	0.92058	1	0.71411	0.26216	0.71034	0.03401	-0.93012	-0.13993	0.71031	0.5105	0.62943	0.28821	0.36528	0.41147	0.62699	0.31385	-0.11191	-0.38984	0.01875
Bio14	0.58551	-0.59579	0.27441	0.5971	-0.61569	0.58085	0.71411	1	-0.02578	0.73608	-0.02075	-0.60529	0.14717	0.50583	0.34687	0.36569	0.16873	0.21094	0.2259	0.36878	0.25409	-0.29328	-0.24344	0.01851
Bio15	0.02635	0.02053	-0.01212	0.02276	0.04545	0.04207	0.26216	-0.02578	1	-0.33176	0.02445	-0.06805	-0.12645	0.20107	0.22108	0.24042	0.19838	0.24492	0.29495	0.33277	0.12259	0.48894	0.14469	-0.02278
Bio19	0.72539	-0.7353	0.41279	0.74273	-0.79403	0.71759	0.71034	0.73608	-0.33176	1	-0.0121	-0.73169	0.08355	0.49688	0.22355	0.31912	0.09299	0.08751	0.07688	0.28508	0.15963	-0.42671	-0.36218	0.03123
Aspect	0.06425	0.01106	0.06633	0.05804	-0.02421	0.06561	0.03401	-0.02075	0.02445	-0.0121	1	-0.03167	-0.09779	0.04844	-0.02033	0.03302	0.02161	0.01313	-0.02521	-0.03025	0.01121	0.07994	-0.08507	0.03666
DEM	-0.97341	0.81393	-0.53769	-0.97303	0.9219	-0.97478	-0.93012	-0.60529	-0.06805	-0.73169	-0.03167	1	0.23841	-0.67171	-0.48259	-0.64138	-0.26861	-0.34462	-0.41095	-0.60961	-0.26374	0.16934	0.52366	-0.02062
Forest_ed	-0.3072	0.07079	-0.26758	-0.29346	0.20533	-0.30899	-0.13993	0.14717	-0.12645	0.08355	-0.09779	0.23841	1	-0.14964	-0.14033	-0.19822	-0.13215	-0.09401	-0.17576	-0.12314	-0.03482	-0.43639	0.45887	0.01121
NDVI04	0.66408	-0.5645	0.39375	0.66135	-0.63935	0.6632	0.71031	0.50583	0.20107	0.49688	0.04844	-0.67171	-0.14964	1	0.44205	0.46965	0.24053	0.32244	0.29765	0.45616	0.17939	-0.02128	-0.3282	0.01671
NDVI05	0.46343	-0.34549	0.15164	0.45271	-0.36287	0.47194	0.5105	0.34687	0.22108	0.22355	-0.02033	-0.48259	-0.14033	0.44205	1	0.55677	0.34183	0.43724	0.57072	0.56753	0.25169	0.0638	-0.23285	0.00937
NDVI06	0.61488	-0.43706	0.29113	0.60324	-0.49548	0.62552	0.62943	0.36569	0.24042	0.31912	0.03302	-0.64138	-0.19822	0.46965	0.55677	1	0.32241	0.42076	0.55466	0.6351	0.22302	0.02984	-0.31981	0.01262
NDVI07	0.26567	-0.17985	0.0667	0.25555	-0.18118	0.27493	0.28821	0.16873	0.19838	0.09299	0.02161	-0.26861	-0.13215	0.24053	0.34183	0.32241	1	0.29409	0.33272	0.3251	0.15575	0.18129	-0.12182	0.00868
NDVI08	0.32488	-0.22425	0.11082	0.31652	-0.24014	0.33249	0.36528	0.21094	0.24492	0.08751	0.01313	-0.34462	-0.09401	0.32244	0.43724	0.42076	0.29409	1	0.47914	0.43146	0.16347	0.07061	-0.13683	0.00435
NDVI09	0.38351	-0.19597	0.16894	0.37086	-0.24936	0.39481	0.41147	0.2259	0.29495	0.07688	-0.02521	-0.41095	-0.17576	0.29765	0.57072	0.55466	0.33272	0.47914	1	0.60684	0.21937	0.1259	-0.19219	0.01066
NDVI10	0.57307	-0.42451	0.25579	0.56633	-0.47092	0.58342	0.62699	0.36878	0.33277	0.28508	-0.03025	-0.60961	-0.12314	0.45616	0.56753	0.6351	0.3251	0.43146	0.60684	1	0.22219	0.02859	-0.26358	0.01233
Nightlight	0.24645	-0.22276	0.05331	0.24365	-0.20912	0.25106	0.31385	0.25409	0.12259	0.15963	0.01121	-0.26374	-0.03482	0.17939	0.25169	0.22302	0.15575	0.16347	0.21937	0.22219	1	0.00982	-0.08916	0.00362
PA_Ed	-0.14228	0.2263	-0.16471	-0.15703	0.26222	-0.12611	-0.11191	-0.29328	0.48894	-0.42671	0.07994	0.16934	-0.43639	-0.02128	0.0638	0.02984	0.18129	0.07061	0.1259	0.02859	0.00982	1	0.0663	-0.04401
Rivers_Ed	-0.5611	0.31087	-0.4615	-0.55438	0.49642	-0.55241	-0.38984	-0.24344	0.14469	-0.36218	-0.08507	0.52366	0.45887	-0.3282	-0.23285	-0.31981	-0.12182	-0.13683	-0.19219	-0.26358	-0.08916	0.0663	1	-0.00969
Slope	0.02086	-0.02733	0.01648	0.02253	-0.03068	0.01981	0.01875	0.01851	-0.02278	0.03123	0.03666	-0.02062	0.01121	0.01671	0.00937	0.01262	0.00868	0.00435	0.01066	0.01233	0.00362	-0.04401	-0.00969	1
